# Supplementary material for: Mechanism of centromere recruitment of the CENP-A chaperone HJURP and its implications for centromere licensing
Source: PubMed Central journal article supplement (PMC6731319; doi:10.1038/s41467-019-12019-6), 2019-09-06
Supplement: 41467_2019_12019_MOESM3_ESM.pdf [file 41467_2019_12019_MOESM3_ESM.pdf]

## Description of Additional Supplementary Files

File Name: Supplementary Data 1

Description: **Resource Table.** The table reports type and source of plasmids, reagents (antibodies, chemicals, peptides, siRNA, primers), and cell lines (bacterial, mammalian) used in this study

File Name: Supplementary Data 2

Description: **Table of cross-links.** The table reports a list of inter-molecular crosslinks obtained by photo-activation of HJURP modified with Bpa at residues F438, Y445, Y557, F584, or Y591 or modified with AbK at residues E444, E583, or K590
